# Supplementary material
Source: Springer Nature journal article supplement (https://www.springermedizin.de/resource/supplementary/12958_2007_403_MOESM1_ESM.pdf/9567814)

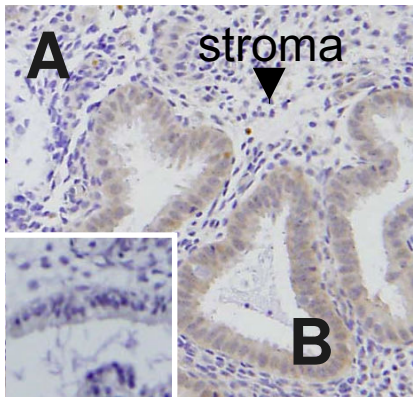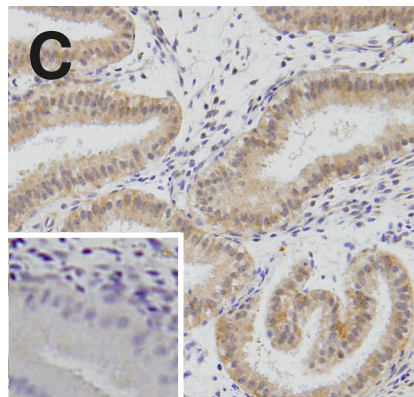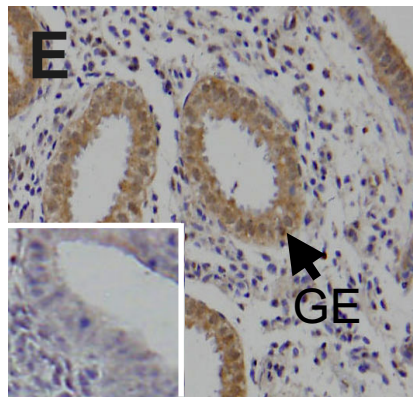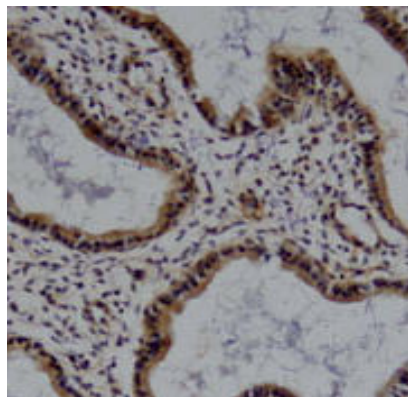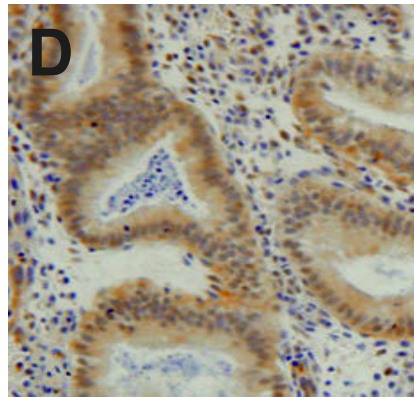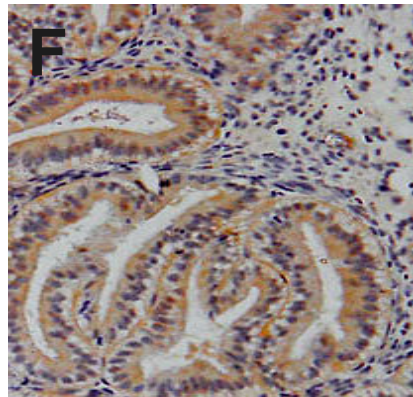

Supplement: MOESM1 [file 9567814]
